# Supplementary material for: Even–odd product variation of the Cn+ + D2 (n = 4–9) reaction: complexity of the linear carbon cation electronic states
Source: Royal Society of Chemistry journal article supplement (doi:10.1039/c5cp04480d), 2015-01-01
Supplement: c5cp04480d1.pdf [file c5cp04480d1.pdf]

# Supplementary Material for “Even-odd product variation of the $C_n^+ + D_2$ ( $n=4-9$ ) reaction: Complexity of the linear carbon cation electronic states”

Kiichirou Koyasu<sup>a+</sup>, Tomohiro Ohtaki<sup>a</sup>, Bing Jin<sup>b</sup>, Kaito Takahashi<sup>b\*</sup>, and  
Fuminori Misaizu<sup>a\*</sup>

*a) Department of Chemistry, Graduate School of Science, Tohoku University,  
Aramaki-Aoba, Aoba-ku, Sendai 980-8578, Japan*

*b) Institute of Atomic and Molecular Sciences, Academia Sinica,  
P.O.Box 23-166, Taipei, 10617 Taiwan R. O. C.*

*+) Present address: Department of Chemistry, School of Science, The University of  
Tokyo, 7-3-1 Hongo, Bunkyo-ku, Tokyo 113-0033, Japan*

**\*FM: Tel +81 22 – 795 – 6577, Email: misaizu@m.tohoku.ac.jp ;**

**\*KT: Tel+886-223668237, Email: kt@gate.sinica.edu.tw**

Details concerning the experimental results, details on the quantum chemistry calculation of reactants and products, and details concerning the potential energy surface calculation are given in the supplementary material. Figures of the ion spectrum of  $C_n^+$ , D adduct,  $D_2$  adduct; comparison of reactivity of linear and cyclic  $C_9^+$  chains; molecular orbitals for  $C_n^+$  ( $n=4-9$ ) as well as the stable geometries of the  $C_n^+$ ,  $C_nD^+$ ,  $C_nD_2^+$ , and  $DC_nD^+$  are given in the supplementary materials. Tables of the relative

energies of  $C_n^+$ ,  $C_nD^+$ ,  $C_nD_2^+$ , and  $DC_nD$ , the frequencies for the  $D_2$  adducts, and comparison on the dissociation energy of the products; as well as full reference 33 are available in the supplementary material.

### **Detailed method to experimentally obtain the collision cross section:**

The ion mobility  $K$  was obtained under the number of density  $N$  at the experimental condition. In order to compare this with results obtained at different conditions,  $K$  was corrected to the reduced ion mobility at the standard condition,  $K_0$ . The formula for the calculation is expressed as follow,

$$K_0 = \frac{N}{N_0} K = \frac{T_0}{T} \frac{p}{p_0} K. \quad (\text{S1}),$$

where  $T_0 = 273.15$  K and  $p_0 = 760$  Torr.

Then, collision cross section,  $\Omega$ , was estimated by using eq. S1 in order to obtain collision numbers of target ion in the drift cell;<sup>1</sup>

$$\Omega = \frac{3e}{16N_0} \sqrt{\frac{2\pi}{k_B \mu T_{\text{eff}}}} \frac{1}{K_0} \quad (\text{S1}),$$

where  $e$ ,  $N_0$ ,  $k_B$ ,  $\mu$ ,  $T_{\text{eff}}$ ,  $K_0$  respectively represent element charge, number density at the standard condition (pressure: 101325 Pa and temperature: 273.15 K), the Boltzmann constant, a reduced mass of target ion and buffer gas (He), an effective temperature, and a reduced ion mobility.

For example,  $K_0$  of  $\text{C}_9^+$  was  $9.671 \times 10^{-4} \text{ m}^2 \text{ V}^{-1} \text{ s}^{-1}$ , and then of  $\Omega$  of  $\text{C}_9^+$  was  $47.02 \text{ \AA}^2$ .

### **Detailed method to fit the experimentally obtained intensity:**

Decay of  $\text{C}_n^+$  intensity and growth of intensities of  $\text{C}_n\text{D}^+$  and  $\text{C}_n\text{D}_2^+$  were fitted by the following formula;

$$\text{Decay: } [\text{C}_n^+(t)] = [\text{C}_n^+(t=0)] \exp(-A [\text{D}_2] t) \quad (\text{S2})$$

$$\text{Growth: } [\text{C}_n\text{D}^+(t)] = [\text{C}_n^+(t=0)] B \{1 - \exp(-C [\text{D}_2] t)\} \quad (\text{S3})$$

## Detailed discussion on experimental results:

As shown in Fig. S1, using the time of flight mass spectra, we can quantify the reactants and products. The peaks for the parent, and single/double D adducts can be seen clearly in the figures. From the D<sub>2</sub> concentration dependence of the signal for isomer selected C<sub>9</sub><sup>+</sup> given in Fig. S2, we can quantify that the linear species react while the cyclic do not.

## Detailed discussion and convergence tests for the quantum chemistry calculation:

All the ROHF-UCCSD(T)/cc-pVTZ energies for C<sub>n</sub><sup>+</sup> are given in Tables S1 and S2. The geometries of the two lowest electronic states are given in Fig. S3. To test the basis set dependence we also performed ROHF-UCCSD(T) optimization using the cc-pVDZ and cc-pVQZ basis sets for the symmetry broken <sup>2</sup>Σ and <sup>2</sup>Σ<sub>g</sub>, <sup>2</sup>Σ<sub>u</sub>, and <sup>2</sup>Π<sub>g/u</sub> states for the odd chains. Other than the C<sub>5</sub><sup>+</sup> chain using cc-pVDZ, all other calculation converged to a symmetry broken solution. Previously, Schnell et al.<sup>2</sup> proposed that the symmetry broken solution was an artifact because geometries for the C<sub>5</sub><sup>+</sup> using CCSD(T) method converged to symmetric geometries, but we suspect that this may be due to the use of the small cc-pVDZ basis. We also performed frequency calculation to confirm that the linear geometries were a stable minimum for the <sup>2</sup>Π<sub>g/u</sub> for the even chains and <sup>2</sup>Σ, <sup>2</sup>Σ<sub>g/u</sub> and <sup>2</sup>Π<sub>g/u</sub> for the odd chains using the ROHF-UCCSD(T)/cc-pVTZ method. Only the C<sub>5</sub><sup>+</sup> <sup>2</sup>Π<sub>g</sub>, C<sub>7</sub><sup>+</sup> <sup>2</sup>Σ<sub>g</sub>, and C<sub>9</sub><sup>+</sup> <sup>2</sup>Σ<sub>g/u</sub> states showed small imaginary frequencies to bend the chain as given in Table S3. Thereby, we conclude that within the approximation for ROHF-UCCSD(T) method the symmetry broken <sup>2</sup>Σ (<sup>4</sup>Σ) states are the ground state or lie close in energy with the <sup>2</sup>Π<sub>g/u</sub> states. We note here that for

odd chains the  ${}^2\Pi$  and  ${}^2\Sigma$  states are close in energy and this can be rationalized from the simple counting methods given previously by Mulliken<sup>3</sup>, and Pitzer and Clementi<sup>4</sup>. For a  $C_n^+$  cluster, there are  $n - 1$  sigma bonds and 2 edge  $\sigma$  lone pair orbitals in which  $2n + 2$  electrons can fill. Since there are  $4n - 1$  valence electrons in  $C_n^+$ ,  $2n - 3$  are left to fill the remaining  $\pi$  orbitals. When  $n$  is even ( $n = 2m$ ,  $m = 1, 2, \dots$ ) there are  $4m - 3$  electrons or one unpaired excess  $\pi$  electron, while for odd ( $n = 2m + 1$ ,  $m = 1, 2, \dots$ ) there are  $4m - 1$  electrons or one hole in the  $\pi$  orbital. Thus  ${}^2\Sigma_{g/u}$  state for odd chains can be generated by moving one electron from the  $\sigma$  orbital to the single occupied  $\pi$  to make a closed  $\Pi$  configuration (see Supplementary Fig. S5, 7, 9). This is not possible for even  $C_n^+$ , and rather a  ${}^4\Sigma_{g/u}$  state is found to be lying low in energy to make a half filled  $\Pi$  configuration (see Supplementary Fig S3).

As previously discussed by several groups<sup>5</sup>, the broken symmetry solution may be an artifact due to the use of ROHF based correlation methods. It depends on the competition of resonance effects, orbital sizing effect, and vibronic coupling, thus, requires multireference methods such as multiconfigurational self-consistent field method and multi reference configuration interaction (MRCI) method to clarify whether this is real or an artifact of our calculation method. Previous density functional theory studies by Giuffreda et al.<sup>6</sup> have mentioned the possibility of the symmetry broken  $C_{\infty v}$   $\Sigma$  state being lower in energy for the odd species. As mentioned by Orlova and Goddard<sup>7</sup> for linear  $C_n^+$ , vibronic coupling of two nearly degenerate electronic states  $\Sigma_g$  and  $\Sigma_u$  can split when the  $D_{\infty h}$  symmetry is lowered to  $C_{\infty v}$  since at this symmetry both states belong to the same  $\Sigma$  symmetry representation. This type of vibronic coupling termed pseudo Jahn-Teller interactions have been seen for larger cyclic carbon

chains and other molecules such as  $C_3H_3$ ,  $LiO_2$ , and  $NO_3$ .<sup>5</sup> In the present case, the  ${}^2\Sigma_g$  and  ${}^2\Sigma_u$  states differ by whether the radical spin is in the highest  $\sigma_g$  or  $\sigma_u$  orbital which corresponds to the symmetric and asymmetric combination of the edge  $\sigma$  orbitals (see Figures S4-9). One can easily imagine that as the chain length is elongated the energy difference between these two molecular orbitals will decrease and thus the energy difference between these two electronic states will decrease. As can be seen from Table S1 and S2, as the  $n$  gets larger the energy difference between  ${}^2\Sigma_u$  and  ${}^2\Sigma_g$  ( ${}^4\Sigma_u$  and  ${}^4\Sigma_g$ ) decreased for odd (even) chains. Thereby stabilization by vibronic coupling induced symmetry breaking is stronger for the larger clusters. We do note that for the odd  ${}^2\Sigma_{g/u}$  states we obtained unphysical harmonic frequencies of  $\sim 3300\text{ cm}^{-1}$  for the symmetry breaking CC stretching mode which is usually seen in the  $2100\text{ cm}^{-1}$  region signifying that these calculation results should be used with caution as mentioned by Belau et al.<sup>8</sup> In addition the energy difference between the  $\Sigma_g$  and  $\Sigma_u$  structures is  $\sim 0.3\text{ eV}$  ( $\sim 2400\text{ cm}^{-1}$ ) much less than the zero point vibration energies of the odd carbon chain cations ( $4200$ ,  $5700$  and  $8000\text{ cm}^{-1}$  for  $C_5^+$ ,  $C_7^+$ , and  $C_9^+$ , respectively), thus the nuclear quantum effects must also have to be considered to confirm the existence of the symmetry broken solutions. However we note that for  $C_3^+$  Crawford and coworkers used equation of motion ionization coupled cluster methods (EOM-IP-CCSD) and found that when constraint to a linear form,  $C_3^+$  favors the symmetry broken solution. Our preliminary calculation using the EOM-IP-CCSD and MRCI has shown that the symmetry broken  ${}^2\Sigma$  state solutions have lower energies than the symmetric  ${}^2\Pi$  states for the odd chains  $n=7,9$ . In Figure S10, we present the single occupied molecular orbitals of the symmetry broken  ${}^2\Sigma$  state  $C_5^+$ ,  $C_7^+$ , and  $C_9^+$ . One can clearly notice that this orbital has large density protruding out of the terminal carbon. To estimate the

degree of protrusion we have performed Atoms In Molecules<sup>9</sup> calculation with B3LYP and obtained the atomic dipole  $\vec{\mu}^{\text{ad}}(\vec{R})$  given as

$$\vec{\mu}^{\text{ad}}(\vec{R}) = - \sum_{\alpha} \int_{V_{\alpha}} \rho(\vec{r}_{\alpha}; \vec{R}) \vec{r}_{\alpha} d\vec{r}_{\alpha} = \sum_{\alpha} \vec{\mu}_{\alpha}^{\text{ad}}(\vec{R})$$

where  $\rho(\vec{r}_{\alpha}; \vec{R})$  is the electron density at a position vector  $\vec{r}_{\alpha}$  with respect to nucleus  $\alpha$  at  $\vec{R}_{\alpha}$ . This portion describes the contribution from the shift of the electron position expectation value from the nuclear center. For systems with lone pairs sticking out in a certain direction this atomic dipole contribution is large for that direction. The atomic dipole for the terminal carbon for the symmetry broken  $^2\Sigma$  state  $C_5^+$ ,  $C_7^+$ , and  $C_9^+$  were calculated to be -0.26, -0.19, and -0.13 Debye, respectively. Therefore we can understand that the decrease in reactivity with increasing  $n$  is due to the weakening of the dipolar interaction of the terminal carbon with  $D_2$  for the odd radical abstraction reaction:  $C_n^+ + D_2 \rightarrow C_n D^+ + D$ . This is consistent with the previous notion that increase in  $n$  causes the radical electron to delocalize thus making the protrusion of the electron density of the single occupied orbital to decrease.

### **Detailed discussion on the quantum chemistry calculation for products:**

The geometry of the products for the reaction are given in Figures S11-S13. The relative energies for the products,  $C_n D^+$ ,  $C_n D_2^+$ , and  $DC_n D^+$  are given in Tables S4, S5, and S6, respectively (in the following theory session we will distinguish the single sided  $D_2$  adduct of  $C_n^+$ , shown in supplementary Figure S12, and the acetylene like double sided  $D_2$  adduct of  $C_n^+$ , shown in supplementary Figure S13, using the symbols  $C_n D_2^+$  and  $DC_n D^+$ , respectively). For the single D-atom adduct,  $C_n D^+$ , we can predict from the isoelectronic neutral carbon clusters that the most stable electronic state for odd  $C_n^+$  are

singlet while that for even chains are triplet. We also note that, based on the heat of reactions, only the  $^1\Sigma$  state is likely to be formed for the odd chains, while all  $^1\Sigma$ ,  $^3\Sigma$ , and  $^3\Pi$  states can be formed for the even chains.

Structure of double D adduct can be shown as single-sided adduct,  $C_nD_2^+$ , or double-sided adduct,  $DC_nD^+$ . Both of their doublet states were calculated to be much more stable than the quartet states. We note here that from the mass and collision cross section itself it is difficult to distinguish  $C_nD_2^+$  and  $DC_nD^+$ . The calculated harmonic frequencies for the CD stretching vibration for  $DC_nD^+$  ( $\sim 2600\text{ cm}^{-1}$ ) and  $C_nD_2^+$  ( $2300\text{ cm}^{-1}$ ) have a  $300\text{ cm}^{-1}$  difference. Thereby, infrared vibrational predissociation spectroscopy or multiphoton dissociation heating the CD bond, following the formation of this ion can be performed to confirm which isomer is formed. To aid future studies, the calculated harmonic frequencies and intensities by B3LYP/cc-pVTZ for the most stable conformers are given in the supplementary information Table S7-S12.

For the  $DC_nD^+$  carbon chains, Maier et al.<sup>10</sup> have measured the electronic spectra and report 2.44, 2.48, 2.05, 2.08, 1.73, and 1.78 eV for the lowest energy transition for  $n = 4, 5, 6, 7, 8,$  and  $9$ , respectively. We obtain 2.52, 3.46, 2.19, 2.64, 1.89, and 2.49 eV for the lowest energy transition between the  $\Pi_g$   $\Pi_u$  states for  $n = 4, 5, 6, 7, 8,$  and  $9$ , respectively. While for the even chains, the theoretical values closely match the experimental values, the odd theoretical results are overestimated by 0.6 to 1. eV. From the frequency calculation for these  $DC_nD^+$  linear chains it was calculated that the  $\Pi_g$  states of  $DC_5D^+$  and  $DC_9D^+$ , and  $\Pi_u$  state of  $DC_7D^+$  are not stable minima and have a lower energy isomer by bending the linear chain. We believe that this is the origin of the overestimated transition energy for the odd chain, but since the detailed determination



of the electronic spectra is not the main goal of the present paper we will leave further study on this discrepancy to future work.

Concerning the fragmentation process after the products are formed, as can be seen from Table S13, the  $C_3$  loss channel for  $C_nD_2^+$  requires about 5.5 eV while the exothermicity of the  $C_n^+ + D_2$  reaction forming  $C_nD_2^+$  is about 4.5 eV for these longer chains, thereby an excess of 1 eV collision energy is required for the  $C_3$  loss channel to show up in the  $C_n^+ + D_2 \rightarrow C_nD_2^+$  reaction. In addition, for the  $C_nD^+$  forming channel, the  $C_3$  loss channel for  $C_nD_2^+$  requires 4.5 eV, however the exothermicity of the  $C_n^+ + D_2 \rightarrow C_nD^+ + D$  is about 1.5 eV. As a conclusion more than 3 eV is required in the collision energy. Thereby we think that such process is absent in our experimental set up at room temperature giving at most 0.1 eV of collision energy.

### **Detailed discussion on the potential energy surface calculation:**

In the calculation for the perpendicular approach potential energy surface (Fig S14 and S15), 13 grid points for DD distance (0.6 to 2.6 Å in grids of 0.2 Å; along with 0.74, and 1.9 which corresponds to the equilibrium bond length for  $D_2$  and  $C_nD_2^+$ ), 22 grid points for RCX (0.4 to 2.4 Å in grids of 0.1 Å; along with 0.54 Å which corresponds to the equilibrium distance for  $C_nD_2^+$ ), and 10 grid points for  $\theta$  (0 to 90 degrees in grids of 10 degrees) were employed. In the calculation for the parallel approach potential energy surface (Fig S16, and S17), 12 grid points for DD distance (0.6 to 1.6 Å in grids of 0.1 Å; along with 0.74 which corresponds to the equilibrium bond length for  $D_2$ ), 12 grid points for RCD (0.8 to 1.8 Å in grids of 0.1 Å; along with 1.07 Å which corresponds to the equilibrium distance for  $C_nD^+$ ), and 10 grid points for  $\theta$  (0 to 90 degrees in grids of 10 degrees) were employed. All the effective potential energy surface calculations were done using the B3LYP/cc-pVTZ method. It can be seen that the general

trend for the even species are given by the  $C_4^+$  results and that for the odd can be given by the  $C_5^+$  results.

Using the calculated potential energy surface for B3LYP/cc-pVTZ, we determined the effective reaction path by optimizing RDD and  $\theta$  at a fixed RCX and RCD for the perpendicular, and parallel approach, respectively. In Figure S18, we plot the values of the optimum RDD,  $\theta$  and energy for the perpendicular approach. As can be seen from Fig S18 (b) the angle has a sudden jump at  $RCX=1.3 \text{ \AA}$ , where it changes from sideways ( $\theta\sim 80^\circ$ ) to direct head on ( $\theta\sim 0^\circ$ ). The potential energy surface along this coordinate is all attractive for the B3LYP calculation. In Figure S19, we plot the values of the optimum RDD,  $\theta$ , and energy for the parallel approach. For the even chains similar to the case in the perpendicular approach, a sideways ( $\theta=80^\circ$ ) approach is favored until  $RCD=1.3 \text{ \AA}$  and at  $RCD < 1.3 \text{ \AA}$ ,  $\theta=0^\circ$  is favored. When one compares the potential energy curve of the perpendicular and parallel approach for even chains (Figs S18(a) and S19(a)), one can clearly notice that the attractive potential for the parallel approach is much weaker than in the case of the perpendicular approach. Thereby, for the even  $^2\Pi$  state the reaction is favored to take the perpendicular approach. On the other hand, for the odd chains, a barrier less encounter is favored along  $\theta=0^\circ$  for parallel approach (Fig S19 (b)). Once RCD approaches  $1.5 \text{ \AA}$ , RDD start elongating without any barriers and a smooth elongation of the D–D bond causes formation of  $C_5D^+ + D$ .

Using the above results from the B3LYP calculation, we also calculated the effective potential energy curve using CCSD(T) method. For the perpendicular approach with  $\theta$  fixed at 80 degrees, we calculated 12 grid points for RCX (2.4 to 1.3 Angstrom in grids of 0.1 Angstrom) while allowing the RDD to be optimized. Then for  $\theta$  fixed at 0 degrees, we calculated 10 grid points for RCX (1.25 to 0.35 Angstrom in grids of 0.1 Angstrom) while allowing the RDD to be optimized. For the parallel approach, we fixed  $\theta$  to be equal to 0 and

calculated 25 grid points for RCD (0.57 to 2.97 Angstrom in grids of 0.1 Angstrom) while allowing the RDD to be optimized for the odd chains with  $^2\Sigma$ .

### **Full Reference for 33**

33: MOLPRO is a package of ab initio programs written by H.-J. Werner, P. J. Knowles, F. R. Manby, M. Schütz, P. Celani, G. Knizia, T. Korona, R. Lindh, A. Mitrushenkov, G. Rauhut, T. B. Adler, R. D. Amos, A. Bernhardsson, A. Berning, D. L. Cooper, M. J. O. Deegan, A. J. Dobbyn, F. Eckert, E. Goll, C. Hampel, A. Hesselmann, G. Hetzer, T. Hrenar, G. Jansen, C. Köppl, Y. Liu, A. W. Lloyd, R. A. Mata, A. J. May, S. J. McNicholas, W. Meyer, M. E. Mura, A. Nicklaß, P. Palmieri, K. Pflüger, R. Pitzer, M. Reiher, T. Shiozaki, H. Stoll, A. J. Stone, R. Tarroni, T. Thorsteinsson and M. Wang, A. Wolf, *MOLPRO*, version 2010.1, a package of ab initio programs, see <http://www.mopro.net>.

### **Figures:**

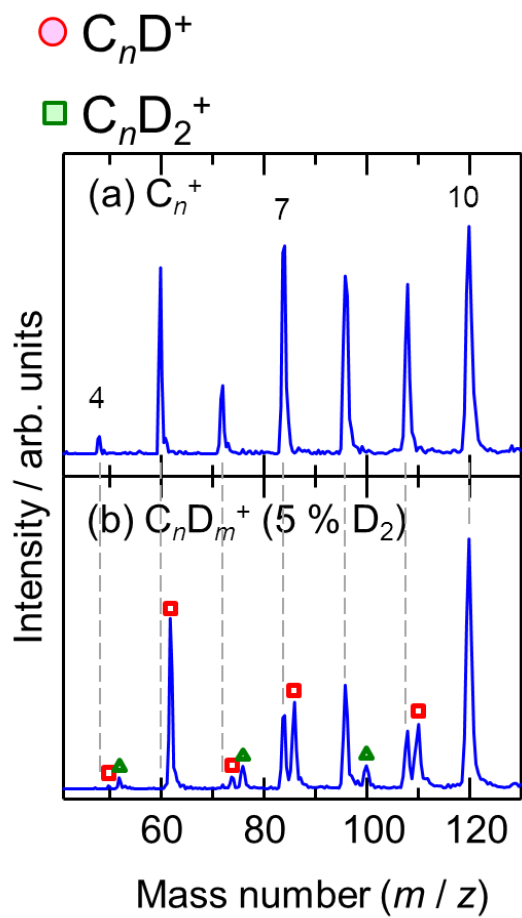

Figure S1: Mass ion spectrum with and without  $D_2$  in the draft chamber.

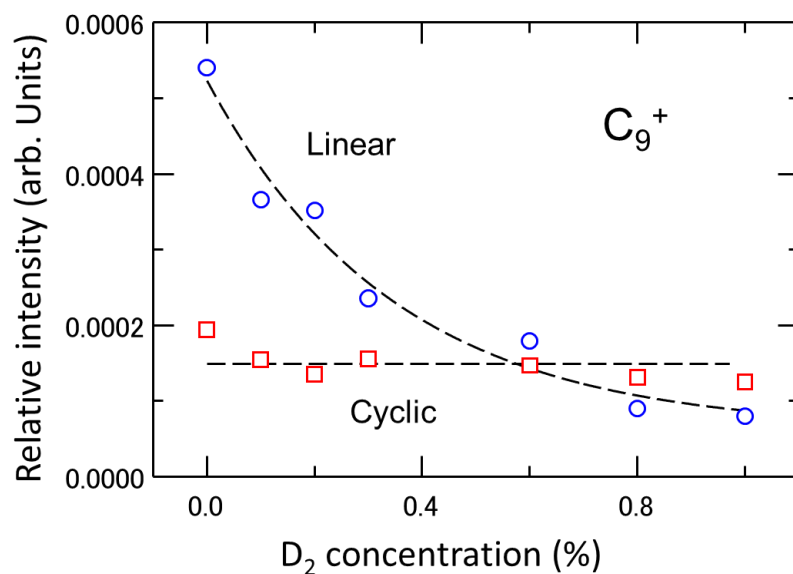

\* Lines are guide for your eyes

Figure S2: Comparison of reactivity of the linear and cyclic  $C_n^+$

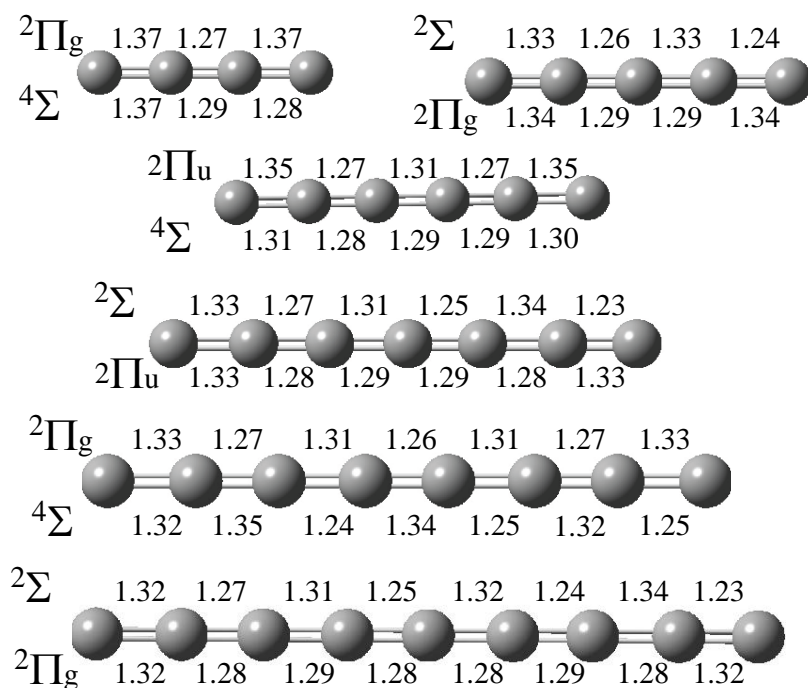

Figure S3: Optimized geometry for the two stable electronic states for linear  $C_n^+$  ( $n = 4-$

9)

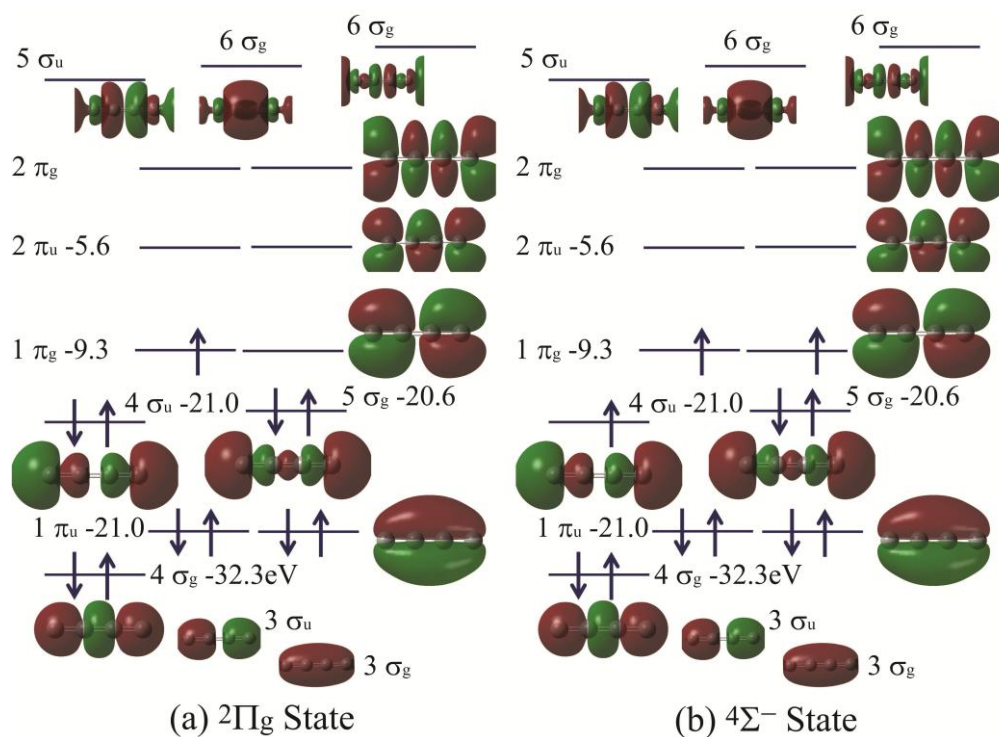

Figure S4: Schematic plot of the molecular orbitals in (a)  $2\Pi_g$  and (b)  $4\Sigma$  of  $C_4^+$

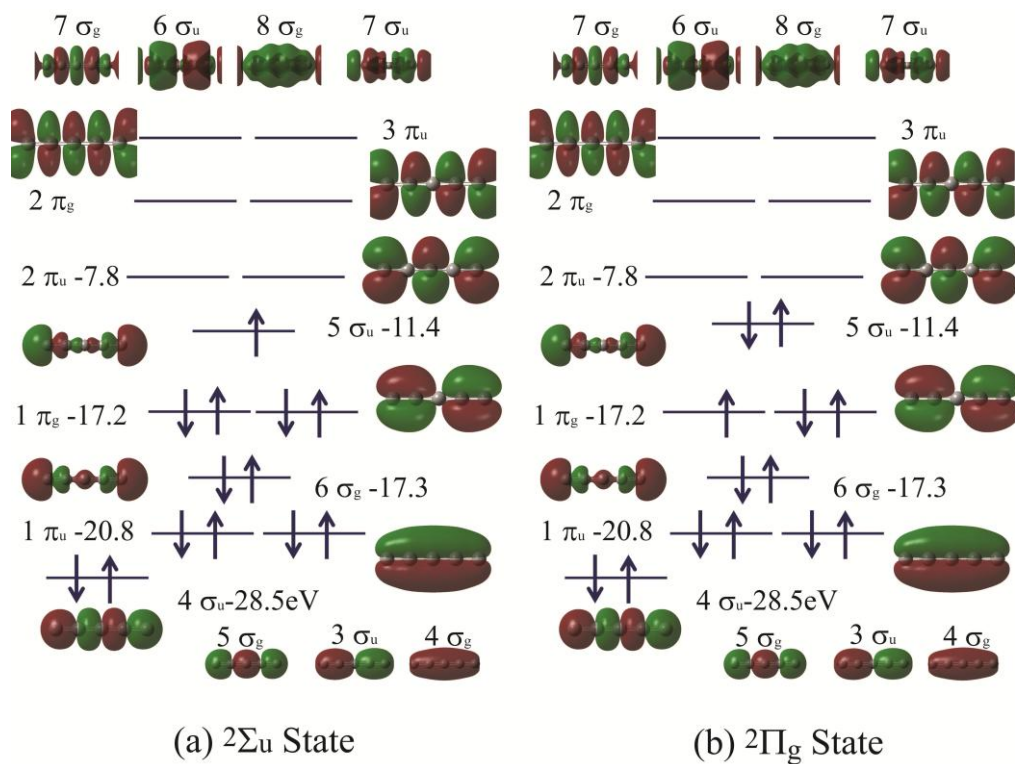

Figure S5: Schematic plot of the molecular orbitals in (a)  $2\Sigma_u$  and (b)  $2\Pi_g$  of  $C_5^+$

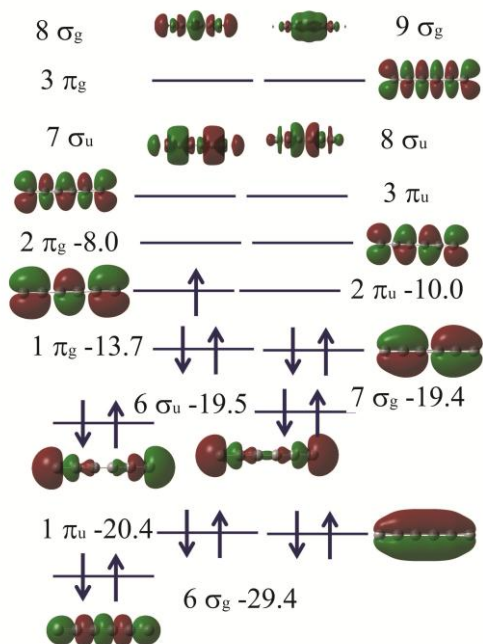

Figure S6: Schematic plot of the molecular orbitals in  ${}^2\Pi_u$  state  $C_6^+$

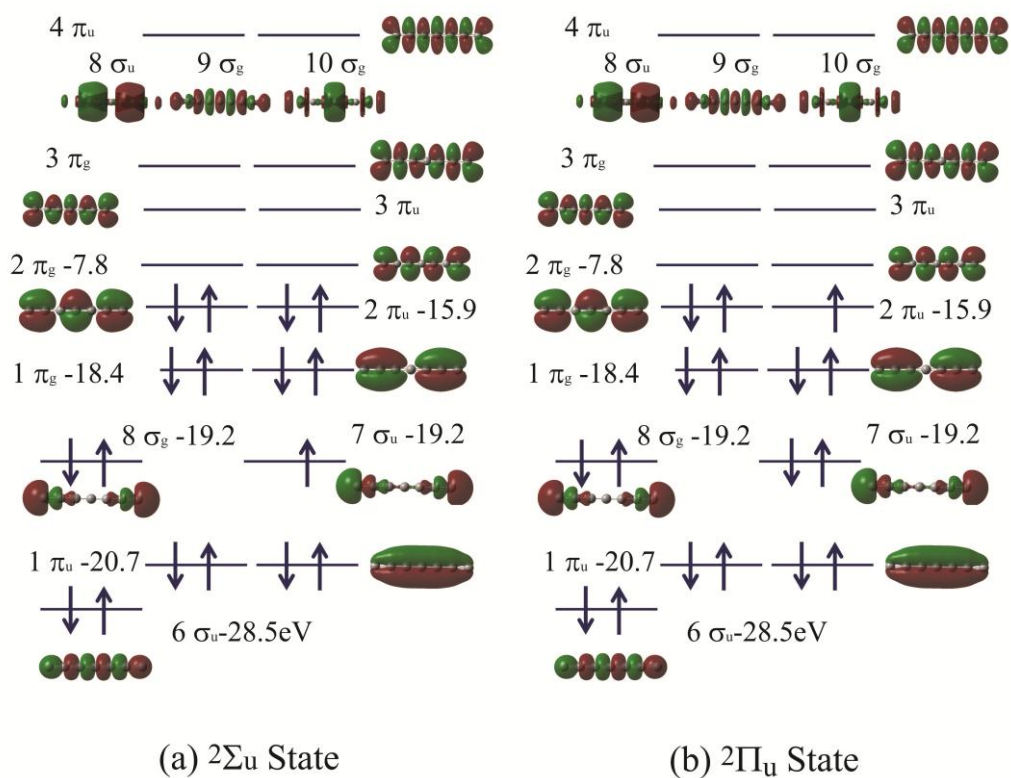

Figure S7: Schematic plot of the molecular orbitals in (a)  ${}^2\Sigma_u$  and (b)  ${}^2\Pi_u$  state of  $C_7^+$

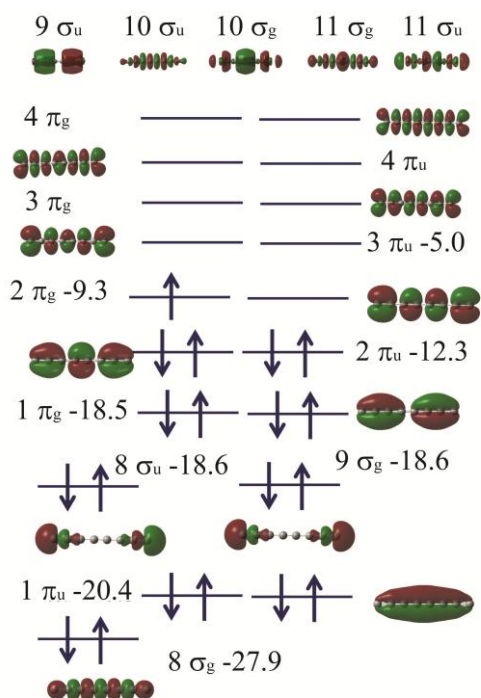

Figure S8: Schematic plot of the molecular orbitals for  ${}^2\Pi_g$  state  $C_8^+$

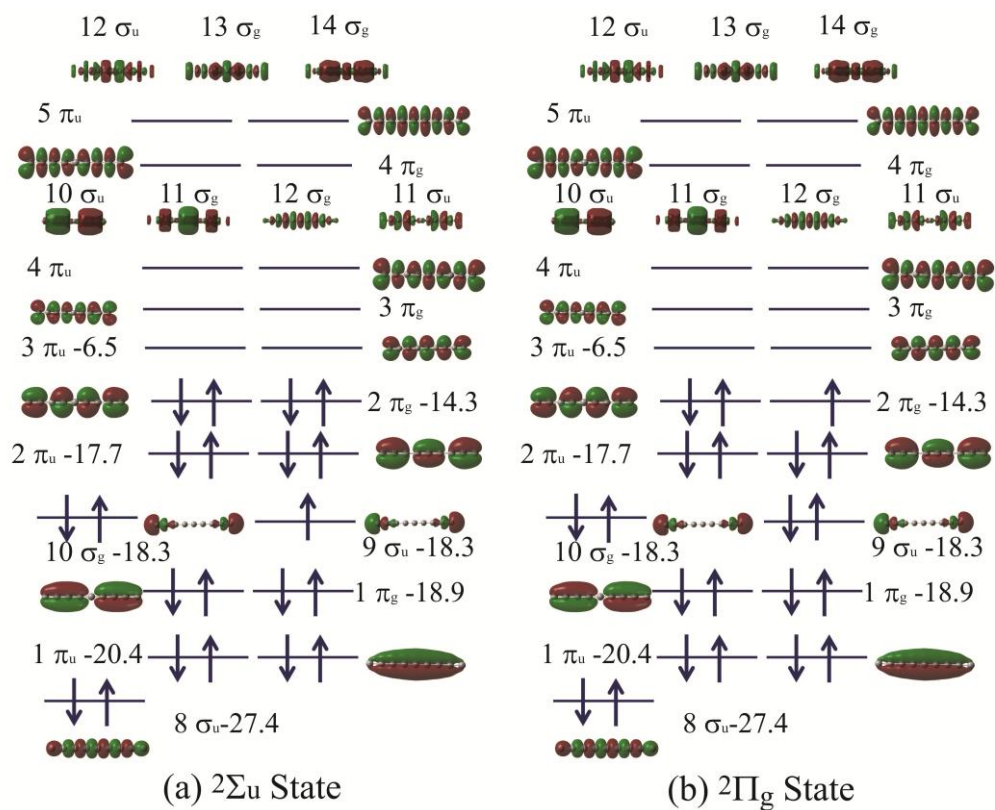



Figure S9: Schematic plot of the molecular orbitals for (a)  ${}^2\Sigma_u$  and (b)  ${}^2\Pi_g$  state  $C_9^+$

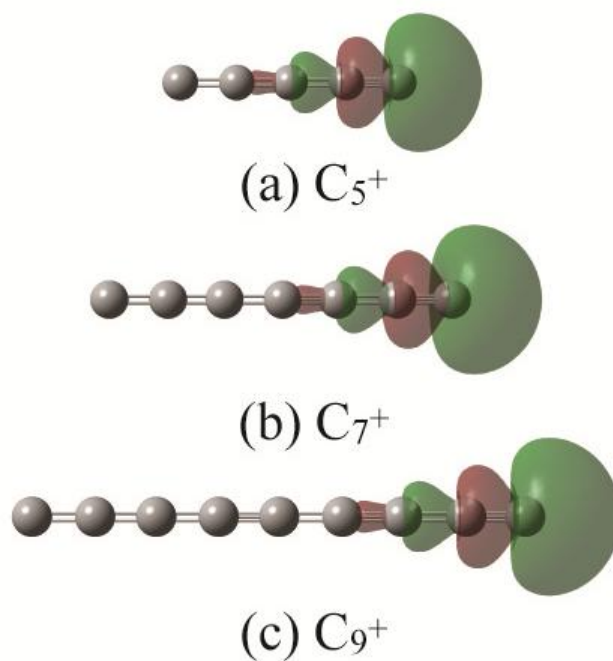

Figure S10: Schematic plot of the single occupied molecular orbitals for the symmetry broken  ${}^2\Sigma$  for (a)  $C_5^+$  (b)  $C_7^+$  and (c)  $C_9^+$

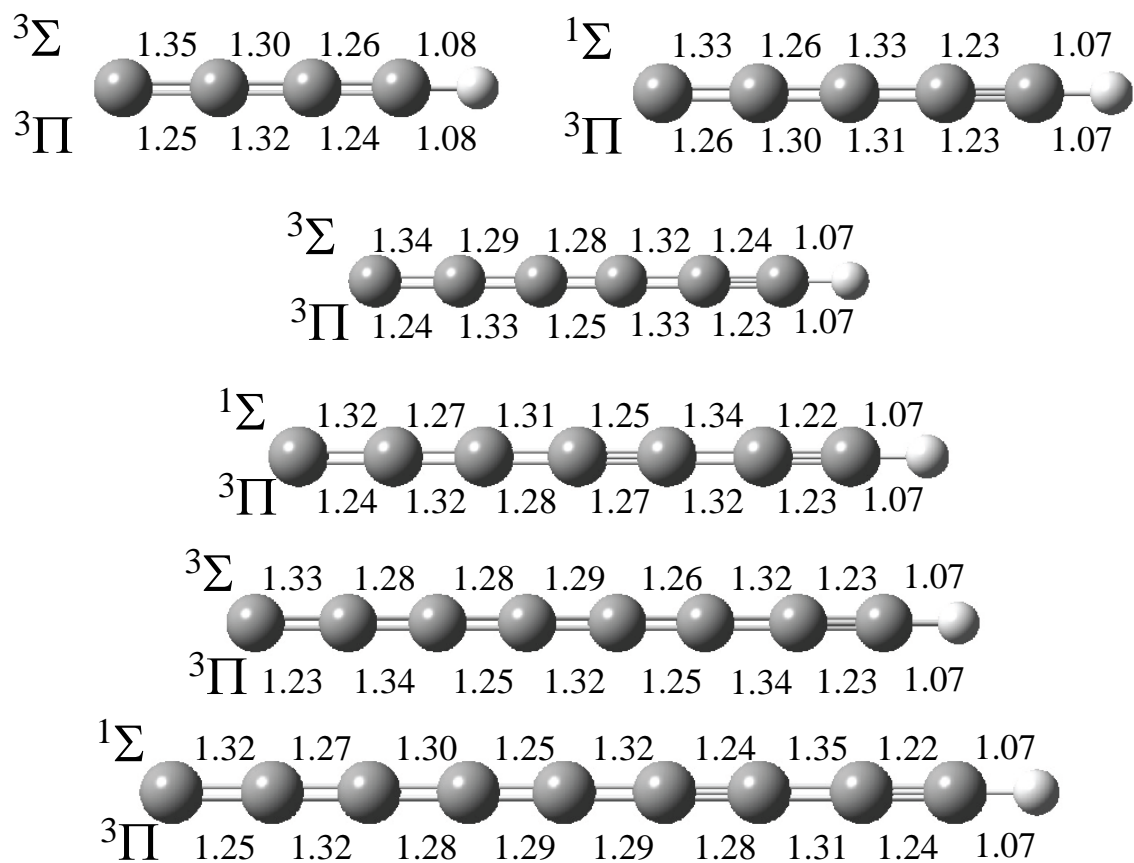

Figure S11: Optimized geometry for the two stable electronic states for linear  $C_nH^+$  ( $n = 4-9$ ).

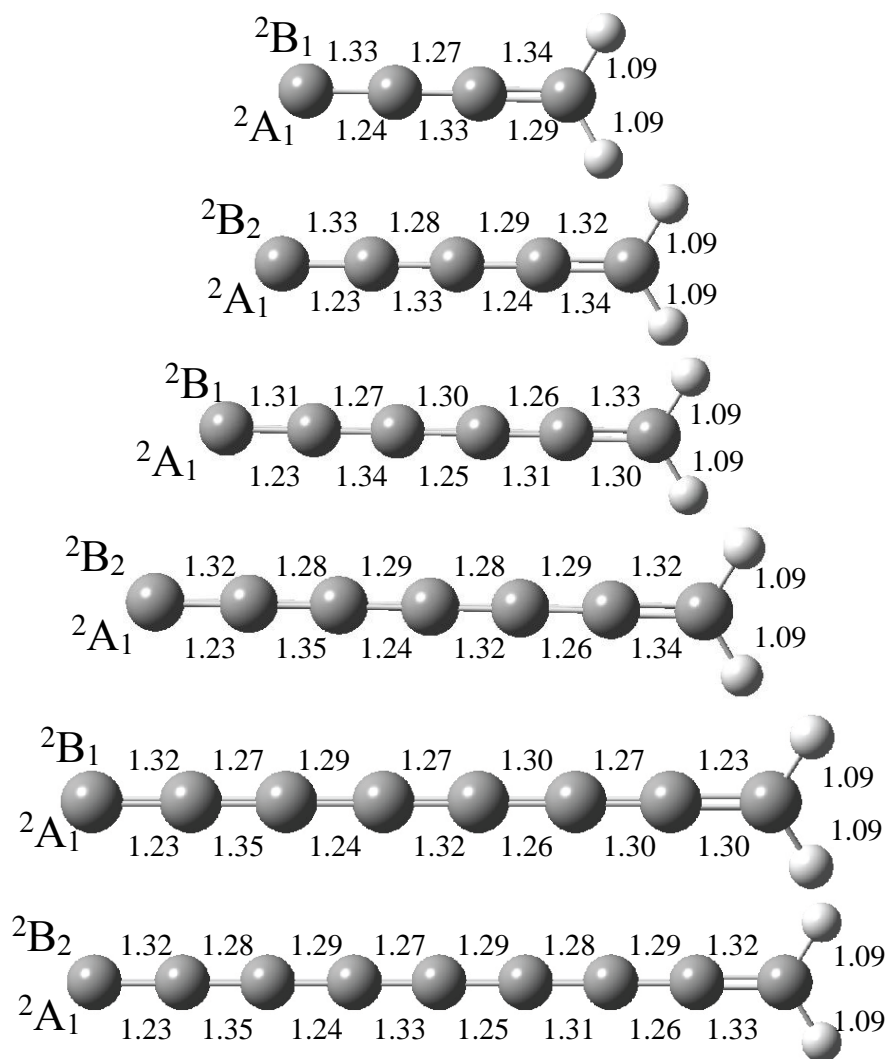

Figure S12: Optimized geometry for the two stable electronic states for linear  $C_nH_2^+$  ( $n = 4-9$ ).

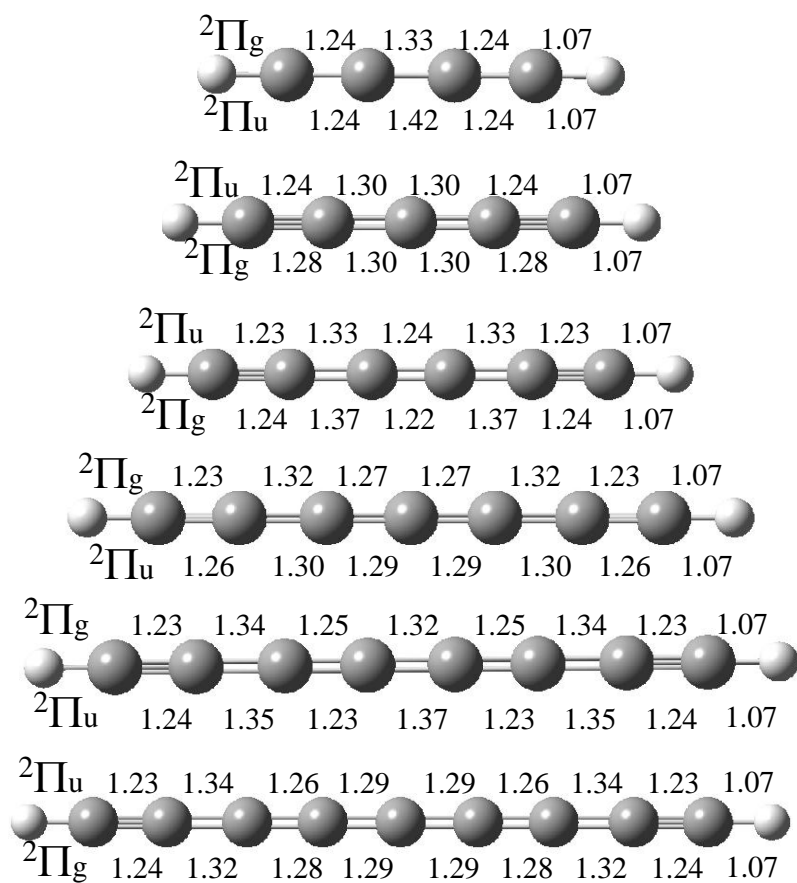

Figure S13: Optimized geometry for the two stable electronic states for linear  $\text{HC}_n\text{H}^+$  ( $n = 4-9$ ).

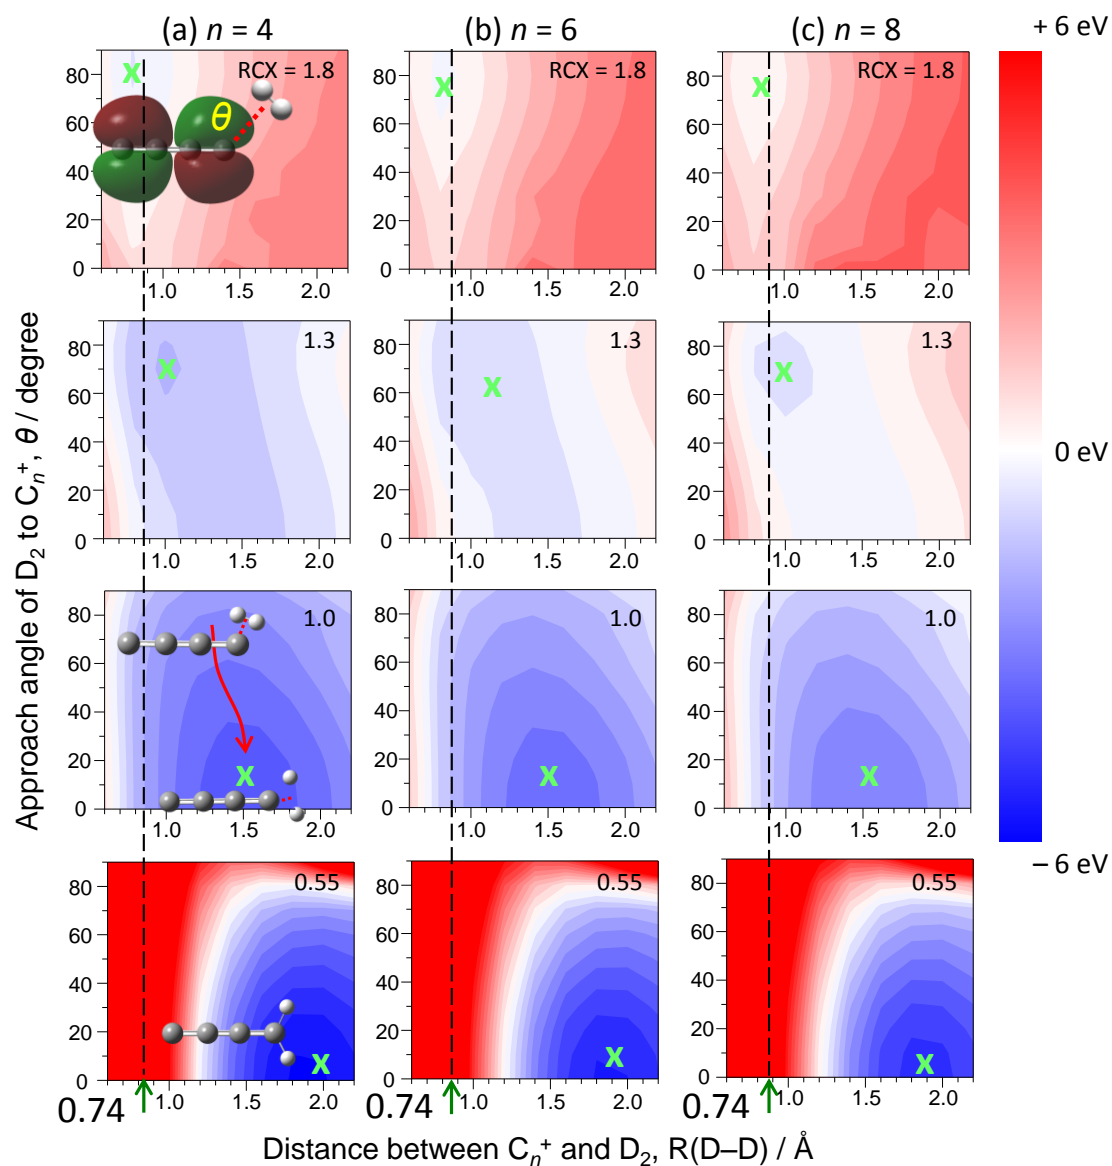

Figure S14: Potential energy surface for perpendicular approach for the  $D_2$  addition to even chain (a)  $C_4^+$  and (b)  $C_6^+$  and (c)  $C_8^+$  at  $RCX=1.8, 1.3, 1.2,$  and  $0.55 \text{ \AA}$  calculated by B3LYP/cc-pVTZ.

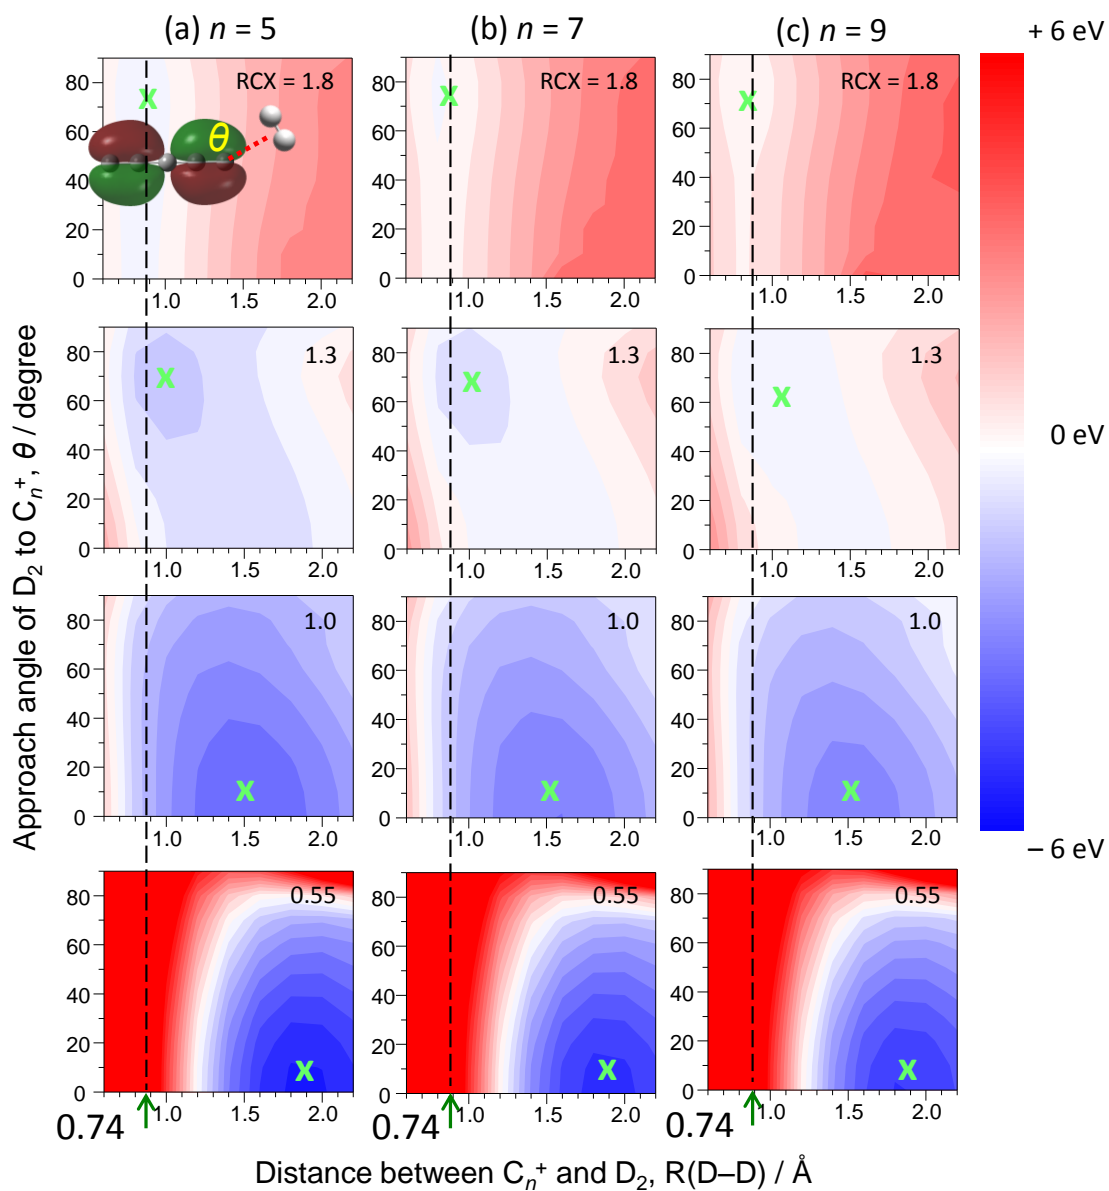

Figure S15: Potential energy surface for perpendicular approach for the  $D_2$  addition to odd chain (a)  $C_5^+$  and (b)  $C_7^+$  and (c)  $C_9^+$  at  $RCX=1.8, 1.3, 1.2,$  and  $0.55 \text{ \AA}$  calculated by B3LYP/cc-pVTZ.

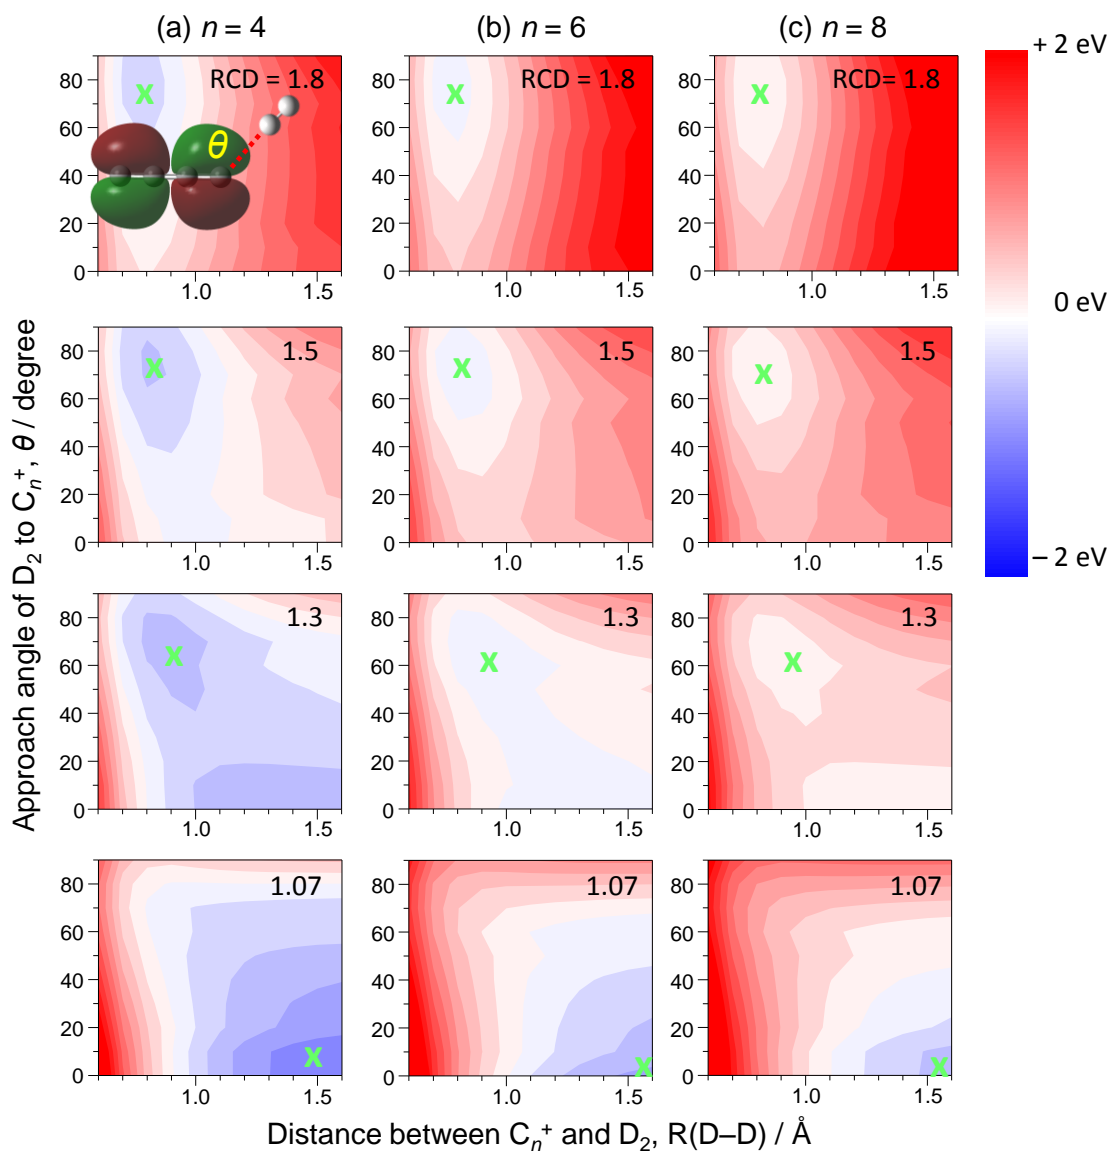

Figure S16: Potential energy surface for parallel approach for the  $D_2$  addition to even chain (a)  $C_4^+$  and (b)  $C_6^+$  and (c)  $C_8^+$  at  $R_{CD}=1.8, 1.3, 1.2,$  and  $0.55 \text{ \AA}$  calculated by B3LYP/cc-pVTZ.

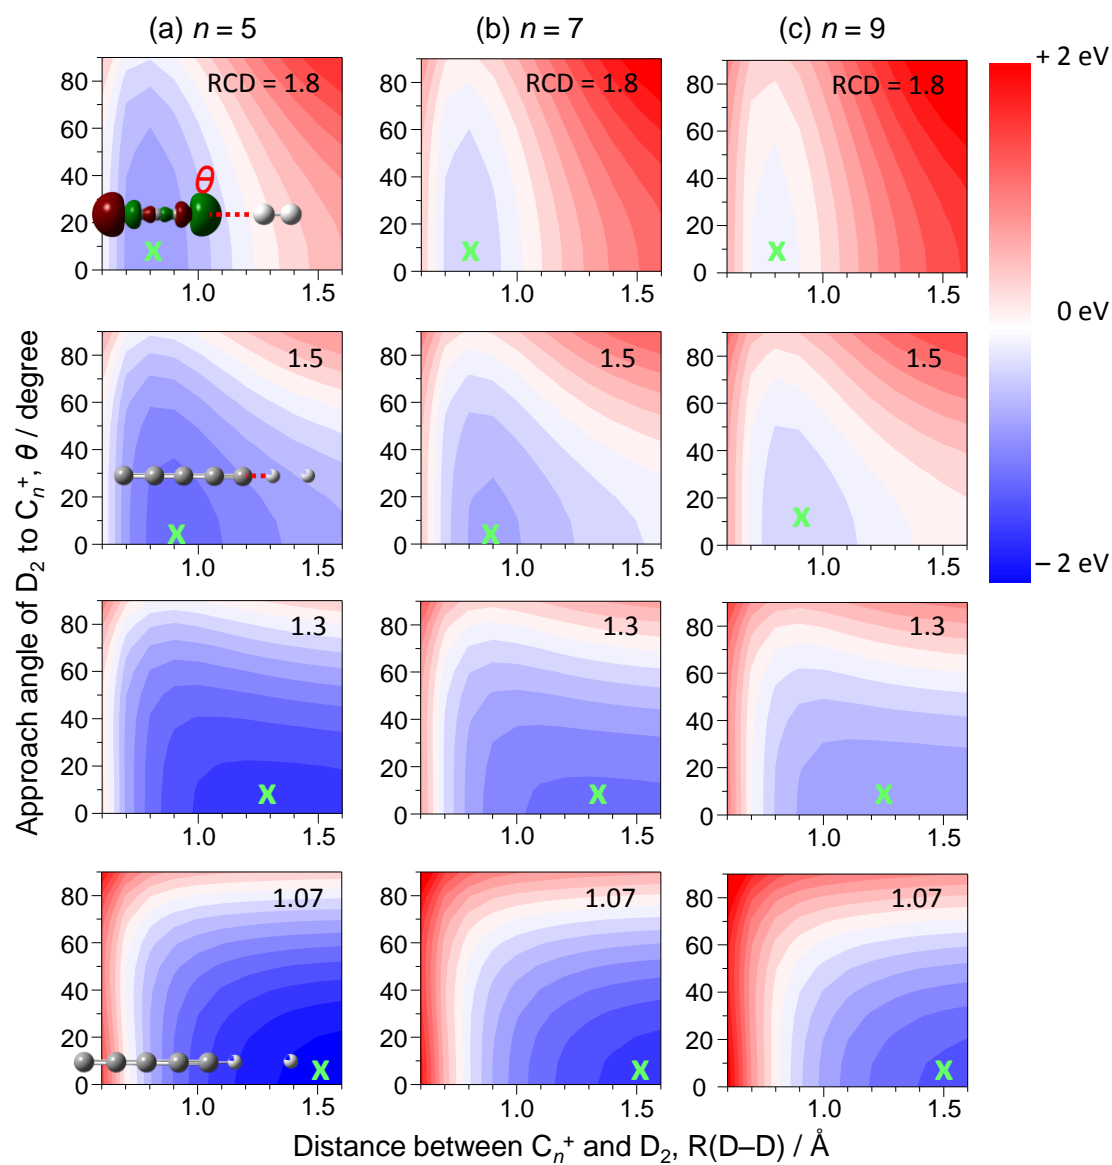

Figure S17: Potential energy surface for parallel approach for the  $D_2$  addition to odd chain (a)  $C_5^+$  and (b)  $C_7^+$  and (c)  $C_9^+$  at  $RCX=1.8, 1.3, 1.2,$  and  $0.55 \text{ \AA}$  calculated by B3LYP/cc-pVTZ.



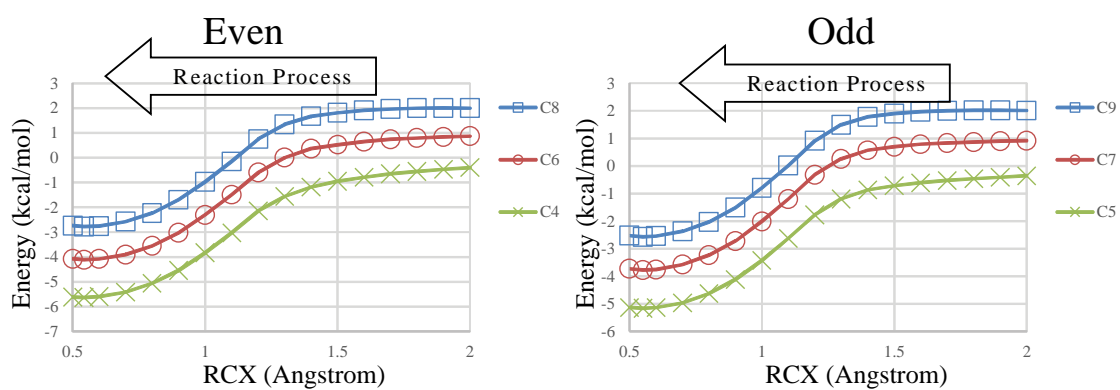

(a) Potential Energy Curve

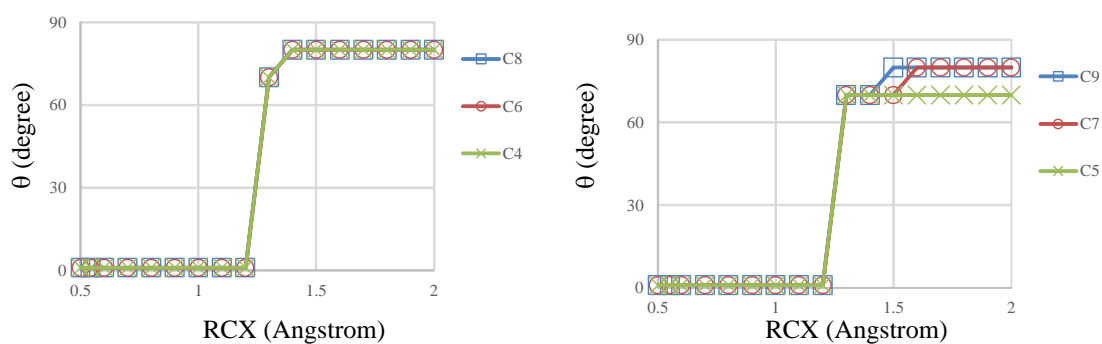

(b) Optimized  $\theta$  (degree)

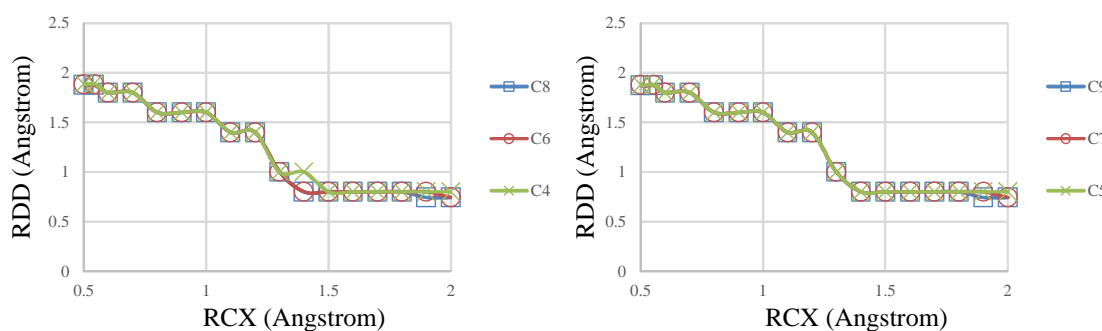

(c) Optimized RDD (Angstrom)

Figure S18: Effective potential energy curve along RCX for  $D_2$  addition for (a) perpendicular approach to  $C_n^+$  ( $n=4-9$ ). The optimized  $\theta$  angle as well as the RDD distance are given in (b) and (c) respectively.

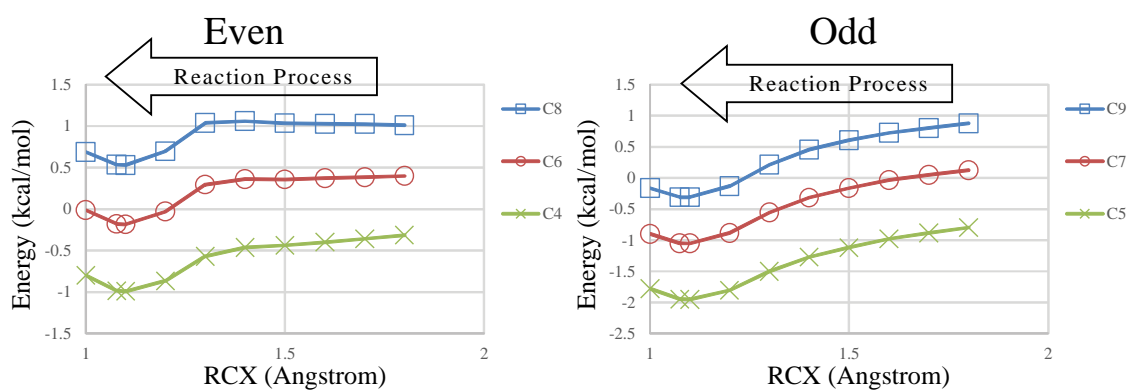

(a) Potential Energy Curve

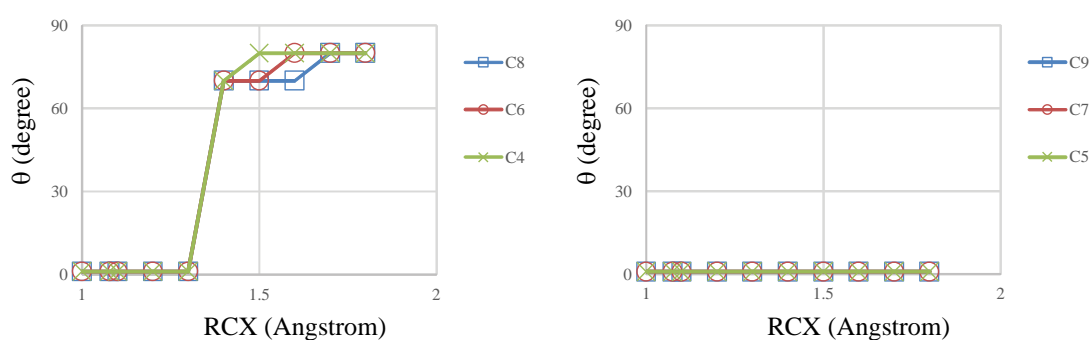

(b) Optimized  $\theta$  (degree)

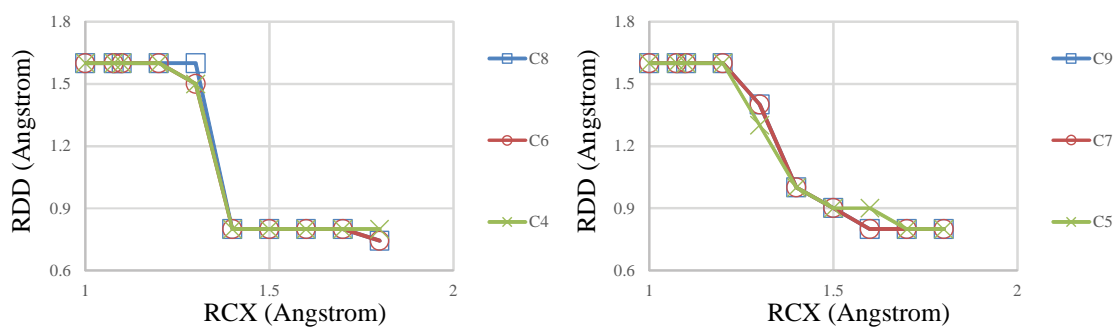

(c) Optimized RDD (Angstrom)

Figure S19: Effective potential energy curve along RCD for  $D_2$  addition for (a) parallel approach to  $C_n^+$  ( $n=4-9$ ). The optimized  $\theta$  angle as well as the RDD distance are given in (b) and (c) respectively.

## Tables:

Table S1: Relative energy, in eV, of the  $C_n^+$  in the doublet state calculated using the CCSD(T)/cc-pVTZ method. Available experimental values by Maier et al.<sup>9</sup> are given in parenthesis<sup>a</sup>.

| state                 | $C_4^+$ | $C_5^+$ | $C_6^+$        | $C_7^+$ | $C_8^+$             | $C_9^+$ |
|-----------------------|---------|---------|----------------|---------|---------------------|---------|
| $C_{2v} \ ^2\Sigma$   | 1.13    | 0.00    | 1.11           | 0.00    | 1.07                | 0.00    |
| $D_{2h} \ ^2\Sigma_g$ | 1.28    | 0.33    | 1.38           | 0.31    | 1.37                | 0.33    |
| $D_{2h} \ ^2\Sigma_u$ | 1.59    | 0.24    | 1.41           | 0.30    | 1.37 (1.39)         | 0.33    |
| $D_{2h} \ ^2\Pi_u$    | 2.90    | 3.33    | 0.00           | 0.22    | 1.95<br>(1.81/2.07) | 1.73    |
| $D_{2h} \ ^2\Pi_g$    | 0.00    | 0.49    | 2.43<br>(1.92) | 2.45    | 0.00                | 0.07    |

a: Experimental values from reference 10.

Table S2: Relative energy, in eV, of the  $C_n^+$  in the quartet state with respect to the most stable doublet state.

| state                 | $C_4^+$ | $C_5^+$ | $C_6^+$ | $C_7^+$ | $C_8^+$ | $C_9^+$ |
|-----------------------|---------|---------|---------|---------|---------|---------|
| $C_{2v} \ ^4\Sigma$   | 0.13    | 2.16    | 0.57    | 1.82    | 0.54    | 1.60    |
| $D_{2h} \ ^4\Sigma_g$ | 0.20    | 2.32    | 0.58    | 2.02    | 0.73    | 1.83    |
| $D_{2h} \ ^4\Sigma_u$ | 0.45    | 2.40    | 0.61    | 2.03    | 0.72    | 1.83    |
| $D_{2h} \ ^4\Pi_u$    | 0.52    | 2.59    | 3.21    | 1.38    | 1.05    | 1.54    |
| $D_{2h} \ ^4\Pi_g$    | 3.26    | 5.11    | 0.88    | 1.96    | 3.03    | 1.32    |

Table S3: Frequency information of the linear  $C_n^+$ .

| Size    | Electronic State | Imaginary Frequency? | Imaginary Frequency value and mode ( $\text{cm}^{-1}$ ) | Largest Frequency ( $\text{cm}^{-1}$ ) | Symmetry (using $D_{2h}$ for $D_{\infty h}$ and $C_{2v}$ for $C_{\infty v}$ ) |
|---------|------------------|----------------------|---------------------------------------------------------|----------------------------------------|-------------------------------------------------------------------------------|
| $C_4^+$ | $^2\Pi_g$        | N                    |                                                         | 2086.3                                 | Ag                                                                            |
| $C_5^+$ | $^2\Sigma$       | N                    |                                                         | 2209.7                                 | A1                                                                            |
|         | $^2\Sigma_u$     | N                    |                                                         | 3651.3                                 | B1u                                                                           |
|         | $^2\Sigma_g$     | N                    |                                                         | 3473.1                                 | B1u                                                                           |
|         | $^2\Pi_g$        | Y                    | 188.2, 183.7 bending                                    | 2110.5                                 | B1u                                                                           |
|         | $^2\Pi_u$        | N                    |                                                         | 2145.3                                 | Ag                                                                            |
| $C_7^+$ | $^2\Sigma$       | N                    |                                                         | 2200.3                                 | A1                                                                            |

|         |                |   |              |        |     |
|---------|----------------|---|--------------|--------|-----|
|         | ${}^2\Pi_u$    | N |              | 2481.6 | B1u |
|         | ${}^2\Sigma_u$ | N |              | 3401.1 | B1u |
|         | ${}^2\Sigma_g$ | Y | 0.8 bending  | 3392.4 | B1u |
| $C_8^+$ | ${}^2\Pi_g$    | N |              | 2116.1 | B1u |
| $C_9^+$ | ${}^2\Sigma$   | N |              | 2221.6 | A1  |
|         | ${}^2\Pi_g$    | N |              | 2202.1 | B1u |
|         | ${}^2\Sigma_u$ | Y | 48.5 bending | 3258.1 | B1u |
|         | ${}^2\Sigma_g$ | Y | 59.5 bending | 3257.9 | B1u |

Table S4: Relative energy, in eV, of the  $C_nD^+$  in different spin states, the zero of energy corresponds to the most stable  $C_nD^+$ .

|              | $C_4D^+$ | $C_5D^+$ | $C_6D^+$ | $C_7D^+$ | $C_8D^+$ | $C_9D^+$ |
|--------------|----------|----------|----------|----------|----------|----------|
| ${}^1\Sigma$ | 0.57     | 0.00     | 0.40     | 0.00     | 0.31     | 0.00     |
| ${}^3\Sigma$ | 0.00     | 2.45     | 0.00     | 1.52     | 0.00     | 1.75     |
| ${}^3\Pi$    | 0.17     | 1.61     | 0.34     | 1.50     | 0.42     | 3.92     |

Table S5: Relative energy, in eV, of the  $C_nD_2^+$  in different spin states, the zero of energy corresponds to the most stable  $C_nD_2^+$ .

|           | $C_4D_2^+$ | $C_5D_2^+$ | $C_6D_2^+$ | $C_7D_2^+$ | $C_8D_2^+$ | $C_9D_2^+$ |
|-----------|------------|------------|------------|------------|------------|------------|
| ${}^2A_1$ | 0.38       | 0.26       | 0.40       | 0.33       | 0.38       | 0.33       |
| ${}^2B_1$ | 0.00       | 1.53       | 0.00       | 1.10       | 0.00       | 0.82       |
| ${}^2B_2$ | 1.89       | 0.00       | 1.27       | 0.00       | 0.92       | 0.00       |
| ${}^4A_1$ | 3.21       | 2.15       | 2.60       | 1.91       | 2.28       | 1.69       |
| ${}^4B_1$ | 3.11       | 3.66       |            | 2.77       |            | 2.19       |
| ${}^4B_2$ | 3.98       |            | 3.03       | 1.57       | 2.44       | 1.28       |
| ${}^4A_2$ | 1.53       | 1.31       | 4.87       | 4.39       |            | 4.30       |

Table S6: Relative energy, in eV, of the  $DC_nD^+$  in the double state, the zero of energy corresponds to the most stable  $C_nD_2^+$ .

|            | $DC_4D^+$ | $DC_5D^+$ | $DC_6D^+$ | $DC_7D^+$ | $DC_8D^+$ | $DC_9D^+$ |
|------------|-----------|-----------|-----------|-----------|-----------|-----------|
| $\Sigma_g$ | 5.18      | 5.92      | 5.78      | 5.78      | 7.04      | 5.89      |
| $\Sigma_u$ | 5.73      | 6.06      | 5.98      | 5.96      | 6.16      | 5.89      |

|         |       |       |       |       |       |       |
|---------|-------|-------|-------|-------|-------|-------|
| $\Pi_u$ | 0.83  | -1.61 | -1.79 | 0.91  | -0.03 | -1.86 |
| $\Pi_g$ | -1.69 | 1.85  | 0.40  | -1.74 | -1.92 | 0.63  |

Table S7: Vibrational peak positions in  $\text{cm}^{-1}$  and IR intensities in  $\text{km/mol}$  for the  $\text{DC}_4\text{D}^+$  and  $\text{C}_4\text{D}_2^+$  calculated using B3LYP/cc-pVTZ

| $\text{DC}_4\text{D}^+$ |              | $\text{C}_4\text{D}_2^+$ |              |
|-------------------------|--------------|--------------------------|--------------|
| Peak Position           | IR Intensity | Peak Position            | IR Intensity |
| 191.1                   | 11.8         | 74.8                     | 5.4          |
| 200.5                   | 13.9         | 133.4                    | 0.4          |
| 444.5                   | 0.0          | 357.3                    | 1.0          |
| 482.3                   | 0.0          | 366.9                    | 14.0         |
| 525.2                   | 33.2         | 750.9                    | 10.9         |
| 532.2                   | 0.0          | 810.7                    | 0.7          |
| 623.9                   | 7.7          | 827.6                    | 0.2          |
| 642.4                   | 0.0          | 1059.7                   | 46.5         |
| 921.2                   | 0.0          | 1492.9                   | 142.0        |
| 1801.7                  | 323.7        | 2070.8                   | 386.3        |
| 2120.8                  | 0.0          | 2234.0                   | 87.5         |
| 2583.2                  | 53.1         | 2358.8                   | 39.8         |
| 2623.2                  | 0.0          |                          |              |

Table S8: Vibrational peak positions in  $\text{cm}^{-1}$  and IR intensities in  $\text{km/mol}$  for the  $\text{DC}_5\text{D}^+$  and  $\text{C}_5\text{D}_2^+$  calculated using B3LYP/cc-pVTZ

| $\text{DC}_5\text{D}^+$ |              | $\text{C}_5\text{D}_2^+$ |              |
|-------------------------|--------------|--------------------------|--------------|
| Peak Position           | IR Intensity | Peak Position            | IR Intensity |
| 120.2                   | 9.7          | 72.8                     | 5.7          |
| 127.5                   | 10.7         | 113.6                    | 0.2          |
| 280.6                   | 0.0          | 215.6                    | 12.2         |
| 345.7                   | 0.0          | 251.9                    | 6.3          |
| 393.4                   | 29.0         | 393.4                    | 2.2          |
| 410.8                   | 11.9         | 559.5                    | 5.3          |
| 415.6                   | 0.0          | 722.8                    | 0.5          |
| 572.7                   | 18.4         | 776.6                    | 0.1          |

|        |        |        |       |
|--------|--------|--------|-------|
| 675.7  | 0.0    | 798.3  | 9.7   |
| 681.0  | 1.1    | 1018.1 | 40.3  |
| 759.6  | 0.0    | 1364.3 | 160.0 |
| 1527.3 | 44.2   | 1859.5 | 50.2  |
| 1928.3 | 1092.7 | 2067.7 | 642.1 |
| 1949.1 | 0.0    | 2243.2 | 72.1  |
| 2561.8 | 29.3   | 2351.3 | 27.9  |
| 2595.5 | 0.0    |        |       |

Table S9: Vibrational peak positions in  $\text{cm}^{-1}$  and IR intensities in  $\text{km/mol}$  for the  $\text{DC}_6\text{D}^+$  and  $\text{C}_6\text{D}_2^+$  calculated using B3LYP/cc-pVTZ

| $\text{DC}_6\text{D}^+$ |              | $\text{C}_6\text{D}_2^+$ |              |
|-------------------------|--------------|--------------------------|--------------|
| Peak Position           | IR Intensity | Peak Position            | IR Intensity |
| 98.2                    | 7.0          | 86.0                     | 0.1          |
| 102.4                   | 8.2          | 86.1                     | 0.6          |
| 239.1                   | 0.0          | 186.0                    | 10.8         |
| 241.6                   | 0.0          | 189.6                    | 5.8          |
| 415.8                   | 10.3         | 347.0                    | 0.0          |
| 449.6                   | 13.3         | 388.2                    | 0.1          |
| 506.4                   | 0.0          | 521.4                    | 1.7          |
| 530.1                   | 0.0          | 552.8                    | 3.2          |
| 530.4                   | 25.6         | 628.6                    | 1.3          |
| 556.5                   | 0.0          | 749.1                    | 12.6         |
| 622.3                   | 8.1          | 808.0                    | 0.2          |
| 624.9                   | 0.0          | 991.4                    | 38.5         |
| 639.2                   | 0.0          | 1220.7                   | 55.7         |
| 1235.5                  | 7.1          | 1624.3                   | 127.4        |
| 1889.2                  | 0.0          | 1988.8                   | 12.4         |
| 2006.3                  | 885.6        | 2116.7                   | 1237.1       |
| 2227.5                  | 0.0          | 2256.4                   | 10.8         |
| 2613.9                  | 2.2          | 2373.1                   | 23.1         |
| 2620.2                  | 0.0          |                          |              |

Table S10: Vibrational peak positions in  $\text{cm}^{-1}$  and IR intensities in  $\text{km/mol}$  for the  $\text{DC}_7\text{D}^+$  and  $\text{C}_7\text{D}_2^+$  calculated using B3LYP/cc-pVTZ

| DC <sub>7</sub> D <sup>+</sup> |              | C <sub>7</sub> D <sub>2</sub> <sup>+</sup> |              |
|--------------------------------|--------------|--------------------------------------------|--------------|
| Peak Position                  | IR Intensity | Peak Position                              | IR Intensity |
| 71.7                           | 5.8          | 69.7                                       | 0.2          |
| 73.7                           | 6.3          | 70.3                                       | 0.0          |
| 178.4                          | 0.0          | 152.3                                      | 10.4         |
| 186.8                          | 0.0          | 163.7                                      | 7.4          |
| 296.9                          | 6.6          | 274.8                                      | 0.1          |
| 351.3                          | 9.8          | 275.4                                      | 0.2          |
| 418.1                          | 0.0          | 395.9                                      | 0.8          |
| 439.3                          | 6.6          | 511.3                                      | 0.8          |
| 470.8                          | 26.1         | 514.7                                      | 0.7          |
| 472.0                          | 0.0          | 553.8                                      | 0.5          |
| 523.8                          | 0.0          | 563.1                                      | 6.2          |
| 558.9                          | 0.0          | 780.9                                      | 12.2         |
| 592.4                          | 20.1         | 789.2                                      | 0.0          |
| 650.6                          | 0.0          | 954.6                                      | 44.6         |
| 652.4                          | 3.1          | 1127.3                                     | 33.9         |
| 1080.9                         | 0.1          | 1501.7                                     | 79.6         |
| 1656.3                         | 0.0          | 1866.4                                     | 411.6        |
| 1867.9                         | 2263.5       | 1987.3                                     | 241.9        |
| 1994.2                         | 63.5         | 2133.3                                     | 966.6        |
| 2059.0                         | 0.0          | 2259.5                                     | 149.3        |
| 2607.9                         | 41.6         | 2364.7                                     | 18.6         |
| 2616.1                         | 0.0          |                                            |              |

Table S11: Vibrational peak positions in cm<sup>-1</sup> and IR intensities in km/mol for the DC<sub>8</sub>D<sup>+</sup> and C<sub>8</sub>D<sub>2</sub><sup>+</sup> calculated using B3LYP/cc-pVTZ

| DC <sub>8</sub> D <sup>+</sup> |              | C <sub>8</sub> D <sub>2</sub> <sup>+</sup> |              |
|--------------------------------|--------------|--------------------------------------------|--------------|
| Peak Position                  | IR Intensity | Peak Position                              | IR Intensity |
| 58.5                           | 4.3          | 55.5                                       | 0.0          |
| 60.7                           | 4.9          | 57.6                                       | 0.0          |
| 152.8                          | 0.0          | 133.2                                      | 6.1          |
| 156.2                          | 0.0          | 135.6                                      | 8.7          |
| 265.5                          | 5.6          | 224.7                                      | 0.3          |
| 267.5                          | 6.7          | 232.5                                      | 0.2          |

|        |        |        |        |
|--------|--------|--------|--------|
| 401.5  | 0.0    | 343.3  | 0.6    |
| 429.5  | 0.0    | 386.9  | 2.7    |
| 489.4  | 14.2   | 492.0  | 1.1    |
| 490.1  | 0.0    | 500.2  | 1.1    |
| 514.4  | 0.0    | 507.1  | 0.2    |
| 522.0  | 9.7    | 534.2  | 0.5    |
| 535.7  | 22.4   | 559.7  | 5.0    |
| 535.8  | 0.0    | 745.2  | 13.7   |
| 571.6  | 0.0    | 809.2  | 0.0    |
| 614.7  | 9.1    | 897.4  | 30.8   |
| 615.3  | 0.0    | 1064.7 | 3.9    |
| 952.5  | 0.5    | 1372.0 | 73.4   |
| 1390.2 | 0.0    | 1667.8 | 100.5  |
| 1915.5 | 519.1  | 1919.2 | 1008.7 |
| 2013.2 | 0.0    | 2050.4 | 5.5    |
| 2140.5 | 1318.4 | 2172.2 | 1584.1 |
| 2200.9 | 0.0    | 2264.9 | 14.5   |
| 2626.6 | 0.5    | 2378.6 | 15.7   |
| 2633.9 | 0.0    |        |        |

Table S12: Vibrational peak positions in  $\text{cm}^{-1}$  and IR intensities in  $\text{km/mol}$  for the  $\text{DC}_9\text{D}^+$  and  $\text{C}_9\text{D}_2^+$  calculated using B3LYP/cc-pVTZ

| $\text{DC}_9\text{D}^+$ |                 | $\text{C}_9\text{D}_2^+$ |                 |
|-------------------------|-----------------|--------------------------|-----------------|
| Peak<br>Position        | IR<br>Intensity | Peak<br>Position         | IR<br>Intensity |
| 45.6                    | 3.6             | 46.0                     | 0.0             |
| 47.4                    | 3.9             | 46.7                     | 0.0             |
| 121.4                   | 0.0             | 114.2                    | 7.1             |
| 123.3                   | 0.0             | 115.2                    | 6.0             |
| 214.9                   | 4.7             | 194.7                    | 1.0             |
| 223.7                   | 6.3             | 199.0                    | 0.3             |
| 306.2                   | 0.0             | 289.4                    | 2.5             |
| 352.9                   | 0.0             | 297.2                    | 2.4             |
| 414.8                   | 8.0             | 390.7                    | 0.3             |
| 441.9                   | 0.0             | 443.1                    | 0.4             |
| 457.5                   | 0.0             | 483.8                    | 0.4             |
| 462.6                   | 5.6             | 491.6                    | 0.1             |
| 494.1                   | 4.7             | 527.6                    | 0.3             |
| 499.0                   | 25.3            | 540.5                    | 0.6             |



|        |        |        |        |
|--------|--------|--------|--------|
| 499.3  | 0.0    | 559.3  | 6.3    |
| 555.2  | 0.0    | 768.7  | 13.8   |
| 591.7  | 19.0   | 795.8  | 0.0    |
| 631.5  | 0.0    | 833.7  | 27.5   |
| 631.5  | 5.4    | 1029.8 | 1.9    |
| 859.7  | 6.8    | 1266.3 | 40.3   |
| 1257.5 | 0.0    | 1579.9 | 208.2  |
| 1713.6 | 532.7  | 1848.5 | 96.1   |
| 1814.5 | 3483.5 | 1904.7 | 1083.0 |
| 1969.9 | 0.0    | 2093.4 | 176.1  |
| 2058.5 | 111.5  | 2172.9 | 1647.3 |
| 2137.8 | 0.0    | 2266.5 | 102.5  |
| 2630.8 | 46.5   | 2370.9 | 13.4   |
| 2631.2 | 0.0    |        |        |

Table S13: Dissociation energies in eV for the C, C<sub>2</sub> and C<sub>3</sub>-loss channels for C<sub>n</sub>D<sup>+</sup> and C<sub>n</sub>D<sub>2</sub><sup>+</sup>.

|                                            | C loss | C <sub>2</sub> loss | C <sub>3</sub> loss |
|--------------------------------------------|--------|---------------------|---------------------|
| C <sub>4</sub> D <sup>+</sup>              |        |                     |                     |
| C <sub>5</sub> D <sup>+</sup>              | 7.72   |                     |                     |
| C <sub>6</sub> D <sup>+</sup>              | 5.39   | 7.07                |                     |
| C <sub>7</sub> D <sup>+</sup>              | 7.33   | 6.68                | 7.07                |
| C <sub>8</sub> D <sup>+</sup>              | 5.44   | 6.73                | 4.80                |
| C <sub>9</sub> D <sup>+</sup>              | 7.11   | 6.51                | 6.52                |
| C <sub>4</sub> D <sub>2</sub> <sup>+</sup> |        |                     |                     |
| C <sub>5</sub> D <sub>2</sub> <sup>+</sup> | 6.32   |                     |                     |
| C <sub>6</sub> D <sub>2</sub> <sup>+</sup> | 6.48   | 6.77                |                     |
| C <sub>7</sub> D <sub>2</sub> <sup>+</sup> | 6.22   | 6.67                | 5.67                |
| C <sub>8</sub> D <sub>2</sub> <sup>+</sup> | 6.33   | 6.52                | 5.68                |
| C <sub>9</sub> D <sub>2</sub> <sup>+</sup> | 6.17   | 6.47                | 5.37                |

## References

- <sup>1</sup> E. A. Mason, and E. W. MacDaniel, *Transport Properties of Ions in Gases*, Wiley, NY, 1988.
- <sup>2</sup> M. Schnell, M. Muhlhauser, G. E. Froudakis, and S. D. Pyerimhoff, *Chem. Phys. Lett.*, 2001, **340**, 559-564.

- <sup>3</sup> R. S. Mulliken, *Phys. Rev.* 1939, **56**, 778-781.
- <sup>4</sup> K. S. Pitzer, E. Clementi, *J. Am. Chem. Soc.* 1959, **81**, 4477-4485.
- <sup>5</sup> W. D. Allen, D. A. Horner, R. L. DeKock, R. B. Remington, and H. F. Schaefer III, *Chem. Phys.* 1989, **113**, 11-45. E. R. Davidson W. T. Borden, *J. Phys. Chem.*, 1983, **87**, 4783-4790. T. D. Crawford, J. F. Stanton, W. D. Allen and H. F. Schaefer III, *J. Chem. Phys.* 1997, **107**, 10626-10632. M. L. Leininger, C. D. Sherril. W. D. Allen. and H. F. Schaefer III, *J. Chem. Phys.* 1998, **108**, 6717-6724. C. D. Sherril, M. S. Lee, and M. Head-Gordon, *Chem. Phys. Lett.* 1999, **302**, 425-430. W. Einfeld and K. Morokuma, *J. Chem. Phys.* 2000, **113**, 5587-5597. O. Goscinski, *Int. J. Quantum Chem. Quant Chem Sympo.* 1986, **19**, 51-59. L. Engelbrecht, and B. Liu, *J. Chem. Phys.* 1983, **78**, 3097-3106. A. D. McLean, B. H. Lengsfeld III, J. Pacansky, and Y. Ellinger, *J. Chem. Phys.* 1985, **83**, 3567-3576. S. Sen, P. Seal, and S. Chakrabarti, *Phys Rev. B* 2006, **73**, 245401. T. Torelli, and L. Mitas, *Phys. Rev. Lett.* 2000, **85**, 1702. N. J. Russ, T. D. Crawford, and G.S. Tschumper, *J. Chem. Phys.* 2004, **120**, 7298-7306.
- <sup>6</sup> M. G. Guiffreda, M. S. Deleuze, J. F. Francois, *J. Phys. Chem. A* 1999, **103**, 5137-515.
- <sup>7</sup> G. Orlova, and J. D. Goddard, *Chem. Phys. Lett.* 2002, **363**, 486-491.
- <sup>8</sup> L. Belau, S. E. Wheeler, B. W. Ticknor, M. Ahmed, S. R. Leone, W. D. Allen, H. F. Schaefer III, M. A. Duncan, *J. Am. Chem. Soc.* 2007, **129**, 10229-10243.
- <sup>9</sup> R. F. W. Bader, *Atoms in Molecules. A Quantum Theory*; Oxford University Press: New York, 1990.
- <sup>10</sup> P. Freivogel, J. Fulara, D. Lessen, D. Forney, J. P. Maier, *Chem. Phys.* 1994, **189**, 335-341. J. P. Maier, *J. Phys. Chem. A*, 1998, **102**, 3462-3469. J. Fulara, E. Riaplov, A. Batalov, I. Shnitko, J. P. Maier, *J. Chem. Phys.* 2004, **120**, 7520. J. Fulara, I. Shnitko, A. Batalov, J. P. Maier, *J. Chem. Phys.* 2005, **123**, 044305.
